# Supplementary material
Source: publisher figshare collection journal article supplement (https://sage.figshare.com/ndownloader/files/13993193)
Supplement: Supplementary file 1 [file 13993193]

## Sheet: Sheet1
Supplementary File 1: Notice of Compliance with conditions for new drugs and new indications for existing drugs
Generic name	Brand name	Indication	ATC 2nd level	Date NOC/c	Date NOC/c fulfilled	Date NOC/c withdrawal	Time to NOC/c fulfillment (days)	Time to NOC/c withdrawal (days)	Reason for NOC/c withdrawal	New drug (ND) or new indication (NI)	Biologic (B) or small molecule (SM)	Significant therapeutic advance (STA)/moderate therapeutic avance (MTA)/minimal, no therapeutic advance (NTA)	Date New Drug Submission filed	Time in approval process (days)
delavirdine	Rescriptor	HIV	antivirals for systemic use	1998-07-22	2003-07-22		1826			ND	SM	NTA
nevirapine	Viramune	HIV	antivirals for systemic use	1998-09-04	2004-09-13		2201			ND	SM	NTA
recombinant factor VIIa	Niastase	clotting disorder	antihemorrhagics	1999-02-12	2006-05-19		2653			ND	B	NTA
alteplase	Activase	stroke	antithrombotic agents	1999-02-16	2005-01-26		2171			NI	B
abacavir	Ziagen	HIV	antivirals for systemic use	1999-06-04	2001-09-10		829			ND	SM	NTA
zanamivir	Relenza	influenza	antivirals for systemic use	1999-11-02	2003-08-26		1393			ND	SM	NTA
delavirdine	Rescriptor	HIV	antivirals for systemic use	2000-04-25	2003-07-22		1183			NI	SM	NTA
riluzole	Rilutek	amyotrophic lateral sclerosis	other nervous system drugs	2000-08-30	2007-11-29		2647			ND	SM	STA
amprenavir	Agenerase	HIV	antivirals for systemic use	2001-03-01	2004-07-05		1222			ND	SM	NTA
imatinib	Gleevec	gastrointestinal stromal tumor	antineoplastic agents	2001-09-20	2004-12-29		1196			ND	SM	STA
amprenavir	Agenerase	HIV	antivirals for systemic use	2001-11-21	2004-07-05		957			NI	SM	NTA
celecoxib	Celebrex	prevention of familial adenomatous polyposis	antineoplastic agents	2002-05-28		2004-12-17		934	Increase in cardiovascular risk	NI	SM	NTA
imatinib	Gleevec	chronic myelogenous leukemia - blast crisis	antineoplastic agents	2002-08-07	2018-05-31		5776			NI	SM	STA
bicalutamide	Casodex	prostate cancer	endocrine therapy	2002-11-25		2003-08-18		266	Increase in mortality	NI	SM	NTA
tenofovir	Viread	HIV	antivirals for systemic use	2003-03-18	2005-07-20		855			ND	SM	NTA
imatinib	Gleevec	newly diagnosed chronic myeloid leukemia	antineoplastic agents	2003-10-08	2010-06-17		2444			NI	SM	STA
gefitinib	Iressa	lung cancer	antineoplastic agents	2003-12-17	2009-12-18		2193			ND	SM	NTA
agalsidase alfa	Replagal	Fabry disease	other alimentary tract and metabolism products	2004-02-06		2014-06-20		3787	Discontinued from market	ND	B	STA
celecoxib	Celebrex	prevention of familial adenomatous polyposis	antineoplastic agents	2004-05-20		2004-12-17		211	Increase in cardiovascular risk	NI	SM	NTA
anastrozole	Arimidex	breast cancer	endocrine therapy	2004-06-20	2008-12-02		1626			NI	SM	NTA
memantine	Ebixa	Alzheimer's disease	psychoanaleptics	2004-12-08		2011-04-21		2325	Challenges with patient recruitment based on availability of generics and alternative treatments and the ethics of enrolling Alzheimer’s patients into placebo-controlled trials	ND	SM	NTA
bortezomib	Velcade	multiple myeloma	antineoplastic agents	2005-01-27	2007-09-11		957			ND	SM	NTA
letrozole	Femara	adjuvant treatment of breast cancer in postmenopausal women	endocrine therapy	2005-04-01	2010-12-17		2086			NI	SM	NTA
delta-9-tetrahydrocannabinol/cannabidiol	Sativex	neuropathic pain in patients with Multiple Sclerosis	analgesics	2005-04-15	2018-05-31		4794			ND	SM	NTA
capecitabine	Xeloda	breast cancer	antineoplastic agents	2005-12-07	2008-10-23		1051			NI	SM	NTA
bortezomib	Velcade	multiple myeloma	antineoplastic agents	2006-04-24	2007-09-11		505			NI	SM	NTA
exemestane	Aromasin	breast cancer	endocrine therapy	2006-05-12	2008-06-06		756			NI	SM	NTA
darunavir	Prezista	HIV	antivirals for systemic use	2006-07-28	2009-02-11		929			ND	SM	MTA
sorafenib	Nexavar	renal cancer	antineoplastic agents	2006-07-28	2009-06-12		1050			ND	SM	NTA
sunitinib	Sutent	renal cancer	antineoplastic agents	2006-08-17	2010-04-23		1345			NI	SM	MTA
letrozole	Femara	adjuvant treatment of postmenopausal women with hormone receptor-positive early breast cancer	endocrine therapy	2006-10-06	2010-12-17		1533			NI	SM	NTA
deferasirox	Exjade	thalassemia (iron chelation)	all other therapeutic products	2006-10-18	2016-12-02		3698			ND	SM	NTA
docetaxel	Taxotere	node-positive breast cancer	antineoplastic agents	2006-12-14	2018-05-31		4186			NI	SM	NTA
hepatitis B immune globulin	HepaGam B	prevention of recurrence of hepatitis B	immune sera and immunoglobulins	2007-01-19	2018-05-31		4150			ND	B
levodopa/carbidopa	Duodopa	Parkinson's disease	anti-parkinson drugs	2007-03-01	2014-03-12		2568			ND	SM	NTA
dasatinib	Sprycel	chronic myeloid leukemia	antineoplastic agents	2007-03-26	2009-11-19		969			ND	SM	STA	2006-03-29	362
imatinib	Gleevec	chronic myeloid leukemia (CML) in chronic phase (pediatric)	antineoplastic agents	2007-04-24	2013-02-21		2130			NI	SM	STA
delta-9-tetrahydrocannabinol/cannabidiol	Sativex	adjunctive analgesic treatment	analgesics	2007-08-01	2018-05-31		3956			NI	SM	NTA
nelarabine	Atriance	leukemia (T-cell acute lymphoblastic leukemia) or lymphoma	antineoplastic agents	2007-09-22	2018-05-31		3904			ND	SM		2005-09-28	724
nesiritide	Natrecor	symptomatic Acute Decompensated Heart Failure (ADHF)	cardiac therapy	2007-11-08		2012-08-01		1728	Discontinued from market	ND	B	NTA	2007-02-05	276
pregabalin	Lyrica	central neuropathic pain	antiepileptics	2007-11-09	2010-06-29		963			NI	SM	NTA
raltegravir	Isentress	HIV	antivirals for systemic use	2007-11-27	2009-03-04		463			ND	SM	MTA	2007-04-18	223
lenalidomide	Revlimid	anemia due to myelodysplastic syndromes	immunosuppressants	2008-01-17	2013-06-06		1967			ND	SM	STA	2007-02-12	339
panitumumab	Vectibix	metastatic colorectal carcinoma	antineoplastic agents	2008-04-03	2018-05-31		3710			ND	B	NTA	2006-04-28	706
sunitinib	Sutent	renal cancer	antineoplastic agents	2008-05-01	2010-04-23		722			NI	SM	MTA
idebenone	Catena	Friedreich’s Ataxia	psychoanaleptics	2008-07-23		2013-02-27		1680	Discontinued by company	ND	SM	NTA	2007-10-26	271
nilotinib	Tasigna	chronic myeloid leukemia	antineoplastic agents	2008-09-09	2011-11-30		1177			ND	SM	NTA	2006-12-05	644
bevacizumab	Avastin	HER2-negative breast cancer	antineoplastic agents	2009-02-06		2011-11-25		1022	No reason given	NI	B	NTA
aztreonam for inhalation solution	Cayston	cystic fibrosis patients with chronic pulmonary Pseudomonas aeruginosa infections	antibacterials for systemic use	2009-07-17	2011-05-17		669			ND	SM	NTA	2008-03-25	479
imatinib	Gleevec	adjuvant treatment of adult patients with GIST	antineoplastic agents	2009-12-22	2018-05-31		3082			NI	SM
bevacizumab	Avastin	glioblastoma	antineoplastic agents	2010-03-24	2018-05-31		2990			NI	B	NTA
nilotinib	Tasigna	chronic phase Philadelphia chromosome positive chronic myeloid leukemia	antineoplastic agents	2010-07-22	2011-08-18		392			NI	SM	NTA
everolimus	Afinitor	subependymal giant cell astrocytoma (SEGA) associated with tuberous sclerosis (TS)	immunosuppressants	2011-06-20	2018-05-31		2537			NI	SM	NTA
nilotinib	Tasigna	newly diagnosed Philadelphia chromosome positive chronic myeloid leukemia	antineoplastic agents	2011-06-23	2015-08-19		1518			NI	SM	NTA
dasatinib	Sprycel	adult patients with newly diagnosed Philadelphia chromosome positive (Ph+) chronic myeloid leukemia (CML) in chronic phase	antineoplastic agents	2011-07-19	2015-11-26		1591			NI	SM	STA
crizotinib	Xalkori	Non-small cell lung cancer	antineoplastic agents	2012-04-25	2015-11-18		1302			ND	SM	NTA	2011-06-08	322
remestemcel-L	Prochymal	acute Graft versus Host Disease (aGvHD)	unassigned	2012-05-17	2018-05-31		2205			ND	B		2011-09-15	245
brentuximab vedotin	Adcetris	Hodgkin lymphoma (HL); systemic anaplastic large cell lymphoma (sALCL)	antineoplastic agents	2013-02-01	2018-05-31		1945			ND	B	NTA	2012-04-11	296
eculizumab	Soliris	Paroxysmal nocturnal haemoglobinuria	immunosuppressants	2013-03-01	2015-06-30		851			NI	B	NTA
romidepsin	Istodax	relapsed/refractory peripheral T-cell lymphoma	antineoplastic agents	2013-10-16	2018-05-31		1688			ND	SM	NTA	2011-12-22	664
bosutinib	Bosulif	chronic, accelerated, or blast phase Ph+ CML	antineoplastic agents	2014-03-07	2018-05-31		1546			ND	SM	NTA	2011-12-20	808
simeprevir	Galexos	hepatitic C	antivirals for systemic use	2015-01-30	2017-11-24		1029			NI	SM	MTA
dabrafenib	Tafinlar	unresectable or metastatic melanoma	antineoplastic agents	2015-03-06	2016-05-13		434			NI	SM	NTA
ceritinib	Zykadia	metastatic non-small cell lung cancer	antineoplastic agents	2015-03-27	2018-05-31		1161			ND	SM	NTA	2014-06-16	284
idelalIsib	Zydelig	follicular lymphoma	antineoplastic agents	2015-03-27	2018-05-31		1161			ND	SM	NTA	2014-02-28	392
ponatinib	Iclusig	chronic phase, accelerated phase, or blast phase chronic myeloid leukemia, ALL	antineoplastic agents	2015-04-02	2018-05-31		1155			ND	SM	MTA	2013-05-23	679
pembrolizumab	Keytruda	metastatic melanoma	antineoplastic agents	2015-05-19	2017-12-22		948			ND	B	NTA	2014-06-23	330
ibrutinib	Imbruvica	relapsed or refractory mantle cell lymphoma	antineoplastic agents	2015-07-28	2017-09-12		777			NI	SM	STA
daclatasvir	Daklinza	hepatitic C	antivirals for systemic use	2015-08-13	2016-11-09		454			ND	SM	MTA	2014-05-16	454
asfotase alfa	Strensiq	paediatric-onset hypophosphatasia	other alimentary tract and metabolism products	2015-08-14	2018-05-31		1021			ND	B	STA	2014-11-14	273
blinatumomab	Blincyto	Philadelphia chromosome-negative relapsed or refractory B precursor acute lymphoblastic leukemia (ALL)	antineoplastic agents	2015-12-22	2017-11-16		695			ND	B	NTA	2015-01-30	326
pembrolizumab	Keytruda	metastatic melanoma	antineoplastic agents	2016-03-07	2018-05-31		815			NI	B	NTA
trametinib	Mekinist	metastatic melanoma	antineoplastic agents	2016-03-11	2016-05-13		63			NI	SM	NTA
palbociclib	Ibrance	in combination with letrozole for breast cancer	antineoplastic agents	2016-03-16	2016-11-17		246			ND	SM	NTA	2015-02-12	398
idarucizumab	Praxbind	reversal of the anticoagulant effects of dabigatran	all other therapeutic products	2016-04-29	2018-05-31		762			ND	B	NTA	2015-03-04	422
nivolumab	Opdivo	metastatic melanoma	antineoplastic agents	2016-04-29	2018-05-31		762			NI	B	STA	2015-03-16	410
olaparib	Lynparza	serous epithelial ovarian, fallopian tube or primary peritoneal cancer	antineoplastic agents	2016-04-29	2018-05-31		762			ND	SM	MTA
daratumumab	Darzalex	multiple myeloma	antineoplastic agents	2016-06-29	2018-05-31		701			ND	B	NTA	2015-09-14	289
osimertinib	Tagrisso	non-small cell lung cancer	antineoplastic agents	2016-07-05	2018-01-19		563			ND	SM	MTA	2015-10-01	278
venetoclax	Venclexta	chronic lymphocytic leukemia (CLL)	antineoplastic agents	2016-09-20	2018-05-31		618			ND	SM	NTA	2015-12-21	274
alectinib	Alecensaro	non-small cell lung cancer	antineoplastic agents	2016-09-29	2018-05-31		609			ND	SM		2015-11-12	322
nivolumab	Opdivo	metastatic melanoma	antineoplastic agents	2016-10-26	2018-05-31		582			NI	B	STA
agalsidase alfa	Replagal	Fabry disease	other alimentary tract and metabolism products	2017-02-10	2018-05-31		475			N1	B	STA
atezolizumab	Tecentriq	metastatic urothelial carcinoma	other alimentary tract and metabolism products	2017-04-12	2018-05-31		414			ND	B		2016-07-18	268
durvalumab	Imfinzi	metastatic urothelial carcinoma	antineoplastic agents	2017-11-03	2018-05-31		209			ND	B		2017-02-16	260
nivolumab	Opdivo	metastatic melanoma	antineoplastic agents	2017-11-10	2018-05-31		202			NI	B	STA
olaratumab	Lartruvo	advanced soft tissue sarcoma	antineoplastic agents	2017-11-23	2018-05-31		189			ND	B		2017-03-06	262
sebelipase alfa	Kanuma	lysosomal acid lipase (LAL) deficiency	other alimentary tract and metabolism products	2017-12-15	2018-05-31		167			ND	B		2017-03-23	267
avelumab	Bavencio	metastatic Merkel cell carcinoma	antineoplastic agents	2017-12-18	2018-05-31		164			ND	B		2017-03-23	270
